# Supplementary material for: Graphical analysis for phenome-wide causal discovery in genotyped population-scale biobanks
Source: PubMed Central journal article supplement (PMC7806647; doi:10.1038/s41467-020-20516-2), 2021-01-13
Supplement: 41467_2020_20516_MOESM3_ESM.pdf [file 41467_2020_20516_MOESM3_ESM.pdf]

## Description of Additional Supplementary Files

Supplementary Data 1: Empirical FDRs of the MR and the naive count ExSep methods

Supplementary Data 2: Number of discoveries of the MR and the naive count ExSep methods

Supplementary Data 3: Empirical FDRs of the ExSep model selection test

Supplementary Data 4: Number of discoveries of the ExSep model selection test

Supplementary Data 5: Empirical FDRs and FPRs using the  $\hat{\pi}_1$  estimates

Supplementary Data 6: Number of discoveries using the  $\hat{\pi}_1$  estimates ( $\hat{\pi}_1 > \text{thr}$ )

Supplementary Data 7: Comparison with CAUSE: FDR and number of discoveries (c-MRPRESSO and c-IVW: utilizing the MR methods with a cGAUGE UniqueIV filter, (\*) a variation of cGAUGE with  $p_1=1e-05$  and  $p_2=0.001$ , otherwise cGAUGE was run with  $p_1=0.001$ , and  $p_2=0.01$ ).

Supplementary Data 8: The phenotypes analyzed in the UKBB data

Supplementary Data 9: Selected MR results after the uniqueIV filter, with 0.1 FDR adjustment and  $\pi_1 > 0.25$  (MS\_test: p-value for the ExSep model-selection test, p\_ivw: IVW p-value for causal effect, p\_het\_ivw: IVW p-value for effect heterogeneity, p\_mrpreso: MRPRESSO p-value for causal effect, mrepreso\_global: MRPRESSO p-value for the global test, qvalue: FDR adjusted q-values).

Supplementary Data 10: Significant ExSep model selection test results (0.01 FDR) that are not in the MR results (MS\_test: p-value for the ExSep model-selection test, p\_ivw: IVW p-value for causal effect, p\_het\_ivw: IVW p-value for effect heterogeneity, p\_mrpreso: MRPRESSO p-value for causal effect, mrepreso\_global: MRPRESSO p-value for the global test, qvalue: FDR adjusted q-values).

Supplementary Data 11: All causal inference results after the uniqueIV filter with  $p_1=10^{-06}$  and  $p_2=0.01$  (MS\_test: p-value for the ExSep model-selection test, p\_ivw: IVW p-value for causal effect, p\_het\_ivw: IVW p-value for effect heterogeneity, p\_mrpreso: MRPRESSO p-value for causal effect, mrepreso\_global: MRPRESSO p-value for the global test, qvalue: FDR adjusted q-values).

Supplementary Data 12: All causal inference results after the uniqueIV filter with  $p_1=10^{-06}$  and  $p_2=0.001$  (MS\_test: p-value for the ExSep model-selection test, p\_ivw: IVW p-value for causal effect, p\_het\_ivw: IVW p-value for effect heterogeneity, p\_mrpresso: MRPRESSO p-value for causal effect, mrepreso\_global: MRPRESSO p-value for the global test, qvalue: FDR adjusted q-values).

Supplementary Data 13: All causal inference results after the uniqueIV filter with  $p_1=10^{-07}$  and  $p_2=0.01$  (MS\_test: p-value for the ExSep model-selection test, p\_ivw: IVW p-value for causal effect, p\_het\_ivw: IVW p-value for effect heterogeneity, p\_mrpresso: MRPRESSO p-value for causal effect, mrepreso\_global: MRPRESSO p-value for the global test, qvalue: FDR adjusted q-values).

Supplementary Data 14: All causal inference results after the uniqueIV filter with  $p_1=10^{-07}$  and  $p_2=0.001$  (MS\_test: p-value for the ExSep model-selection test, p\_ivw: IVW p-value for causal effect, p\_het\_ivw: IVW p-value for effect heterogeneity, p\_mrpresso: MRPRESSO p-value for causal effect, mrepreso\_global: MRPRESSO p-value for the global test, qvalue: FDR adjusted q-values).

Supplementary Data 15: The instrument sets discovered by UniqueIV with  $p_1=10^{-07}$  and  $p_2=0.01$  (beta, se, P-value: the GWAS estimates for each variant adjusted for age, sex, and 5 PCs, cGAUGE\_p1 and cGAUGE\_p2: thresholds used as input for the filter)

Supplementary Data 16: The instrument sets discovered by UniqueIV with  $p_1=10^{-07}$  and  $p_2=0.001$  (beta, se, P-value: the GWAS estimates for each variant adjusted for age, sex, and 5 PCs, cGAUGE\_p1 and cGAUGE\_p2: thresholds used as input for the filter).
